# Supplementary material
Source: Royal Society of Chemistry journal article supplement (doi:10.1039/d6ta00579a)
Supplement: d6ta00579a1.pdf [file d6ta00579a1.pdf]

## Supporting Information

### Atomic-Level Growth Engineering of Si via Acetylene–Silane Co-Deposition for Enhanced Cycle Stability and High Li<sup>+</sup> Dynamics in Si/C Anodes

Xintong Xu <sup>a</sup>, Xiao Mu <sup>b</sup>, Tao Huang <sup>b\*</sup>, Aishui Yu <sup>a,b\*</sup>

<sup>a</sup> Department of Chemistry, Collaborative Innovation Center of Chemistry for Energy Materials, Shanghai Key Laboratory of Molecular Catalysis and Innovative Materials, Institute of New Energy, Fudan University, Shanghai 200438, China

<sup>b</sup> College of Smart Materials and Future Energy, Fudan University, Shanghai 200438, China

E-mail: [asyu@fudan.edu.cn](mailto:asyu@fudan.edu.cn). (Aishui Yu\*)

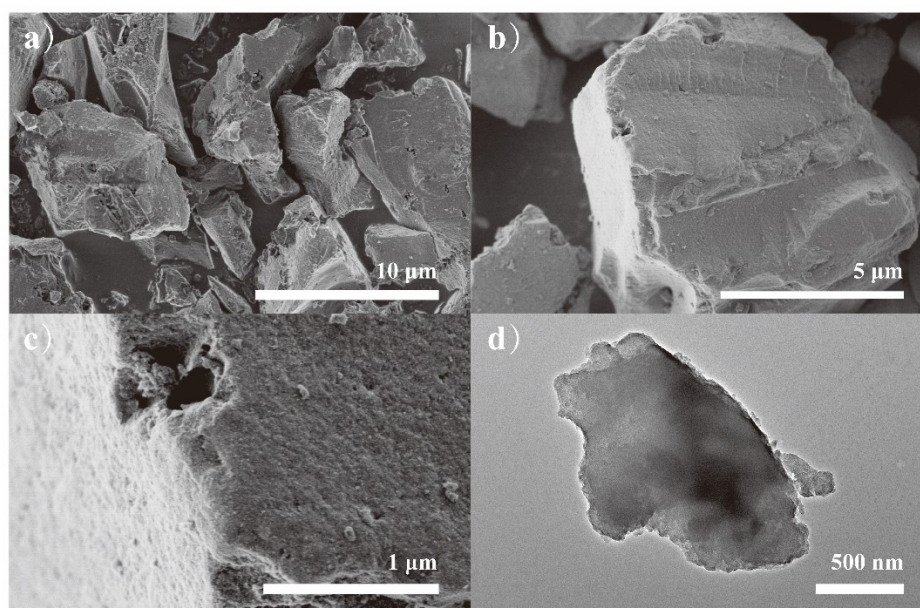

**Figure S1** a-c) SEM and d) TEM images of commercial CVD-Si/C.

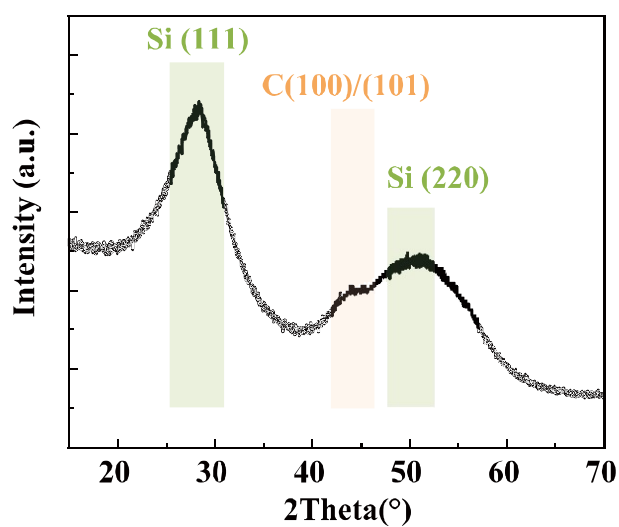

**Figure S2** XRD pattern of commercial CVD-Si/C.

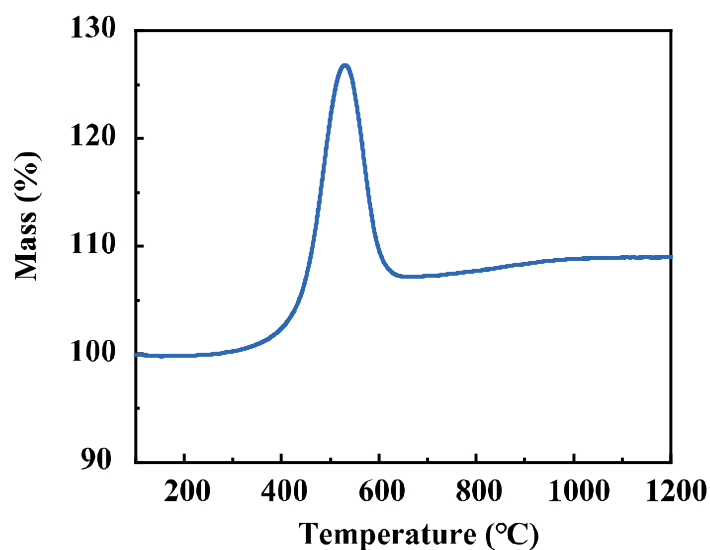

**Figure S3** TGA of commercial CVD-Si/C.

**Equation S1:**

$$w_{Si - total} \% = \frac{m_2 \%}{m_1 \%} \times \frac{28}{60}$$

$m_1$  is defined as the mass percentage of CVD-Si/C measured before oxidation at 100 °C, and  $m_2$  is the mass percentage remaining after oxidation at 1000 °C. The numerical values 28 and 60 represent the atomic mass of silicon and the molar mass of

silicon dioxide (SiO<sub>2</sub>), respectively.

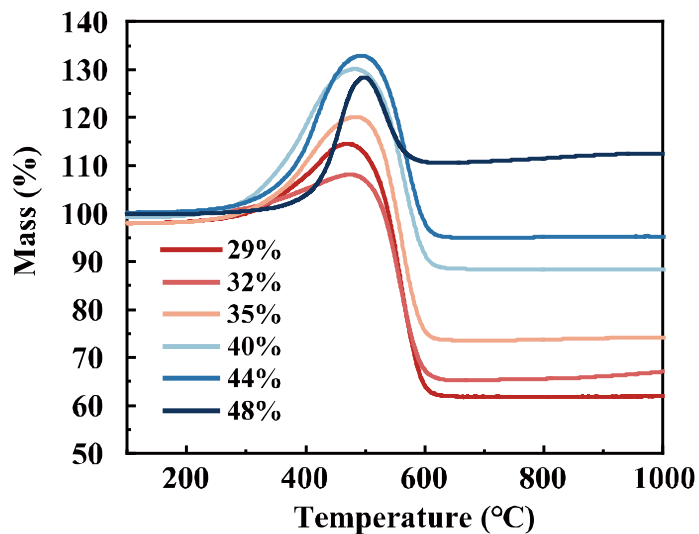

**Figure S4** TGA of CVD-Si/C composites with different Si content.

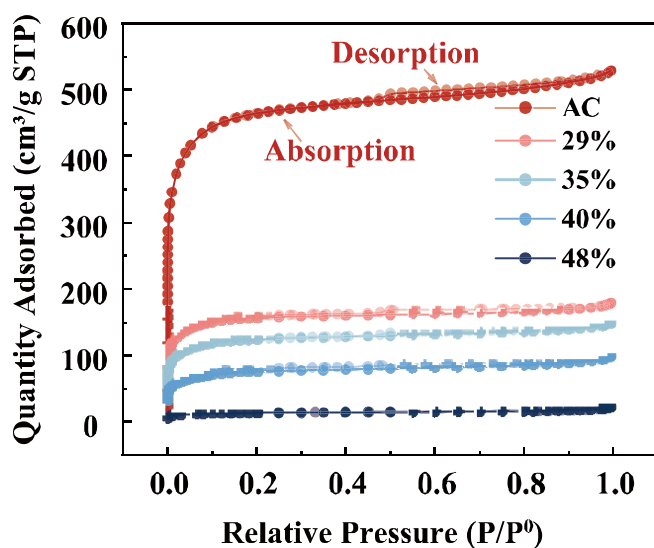

**Figure S5** Argon adsorption-desorption analysis on AC and CVD-Si/C samples with different Si content.

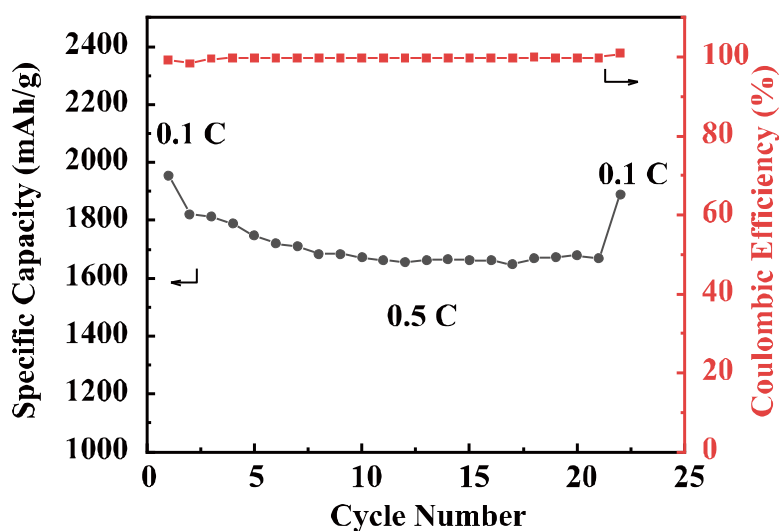

**Figure S6** Cycling performance of CVD-Si/C at 0.5C and 0.1C.

**Table S1** Summary of reversible capacity, lithium trapping capacity, and SEI-derived capacity loss as a function of silicon content.

| Silicon Content (%) | Avg. Reversible Specific Capacity (mAh g <sup>-1</sup> ) | CV-Derived Reversible Capacity (mAh g <sup>-1</sup> ) | CV Fraction (%) | CE-Derived Irreversible Capacity (mAh g <sup>-1</sup> ) | CE Loss Fraction (%) |
|---------------------|----------------------------------------------------------|-------------------------------------------------------|-----------------|---------------------------------------------------------|----------------------|
| 29                  | 745.94                                                   | 50.5                                                  | 7.0             | 17.2                                                    | 2.0                  |
| 32                  | 873.88                                                   | 46.7                                                  | 5.5             | 13.3                                                    | 1.8                  |
| 35                  | 1065.26                                                  | 39.9                                                  | 3.8             | 11.2                                                    | 1.1                  |
| 40                  | 1174.24                                                  | 57.0                                                  | 4.9             | 14.6                                                    | 1.2                  |
| 44                  | 1219.09                                                  | 70.7                                                  | 5.8             | 14.9                                                    | 1.3                  |

Si Content: Silicon mass fraction in the composite.

Avg. Reversible Specific Capacity: Reversible capacity delivered during galvanostatic cycling.

CV-Derived Reversible Capacity: Reversible capacity released during CV steps, reflecting lithium trapped in Li<sub>x</sub>Si.

CV Fraction: Proportion of CV-derived capacity relative to the total reversible capacity.

CE-Derived Irreversible Capacity: Capacity loss attributed to SEI formation, calculated from

coulombic inefficiency.

CE Loss Fraction: Proportion of CE-derived irreversible capacity relative to the total reversible capacity.

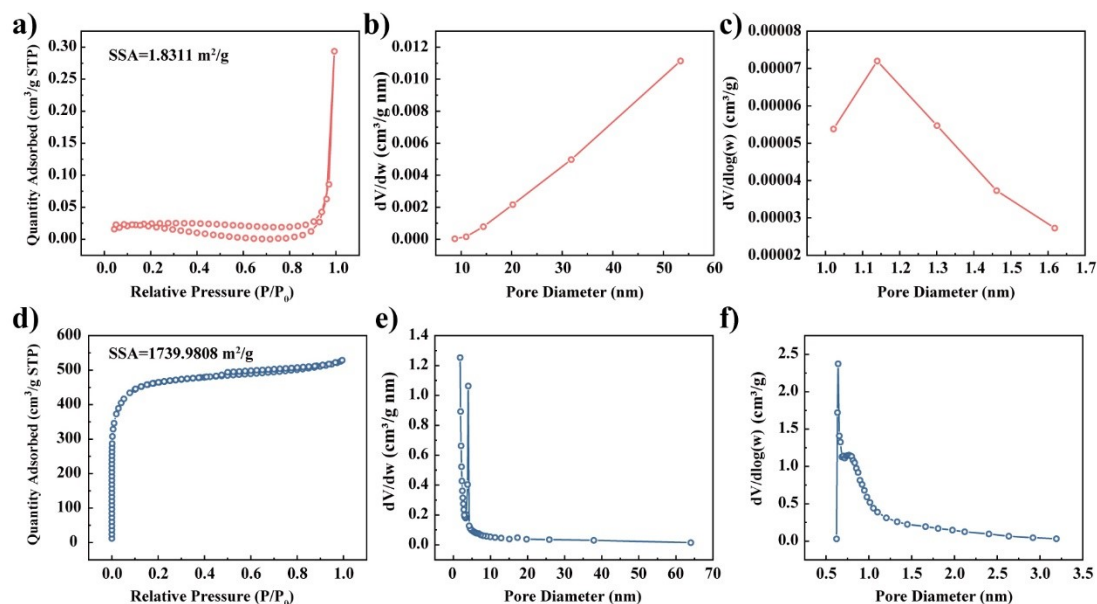

**Figure S7** a) Ar adsorption–desorption analysis, b) mesoporous size distribution, and c) micropore size distribution of ACS/SC@C-2. d) Ar adsorption–desorption analysis, e) mesoporous size distribution, and f) micropore size distribution of AC.

**Equation S2:**

$$w_{Si - co\ deposited} \% = \left( \frac{m_3 \%}{m_1 \%} - 1 \right) \times \frac{28}{32}$$

$m_1$  is defined as the mass percentage of ACS@C or ACS/SC@C measured before oxidation at 100 °C, and  $m_3$  is the mass percentage remaining after oxidation at 400 °C.

**Table S2** Detailed TGA data for Si content calculation.

| Samples    | $m_1$  | $m_2$ | $m_3$  | $w_{Si-co\ deposited}$ | $w_{Si-total}$ |
|------------|--------|-------|--------|------------------------|----------------|
| ACS@C      | 100.11 | 86.13 | /      | /                      | 40.14          |
| ACS/SC@C-1 | 100.02 | 81.07 | 102.36 | 2.04                   | 38.05          |
| ACS/SC@C-2 | 100.19 | 85.22 | 105.65 | 4.77                   | 39.54          |
| ACS/SC@C-3 | 100.56 | 83.28 | 107.05 | 5.65                   | 39.09          |

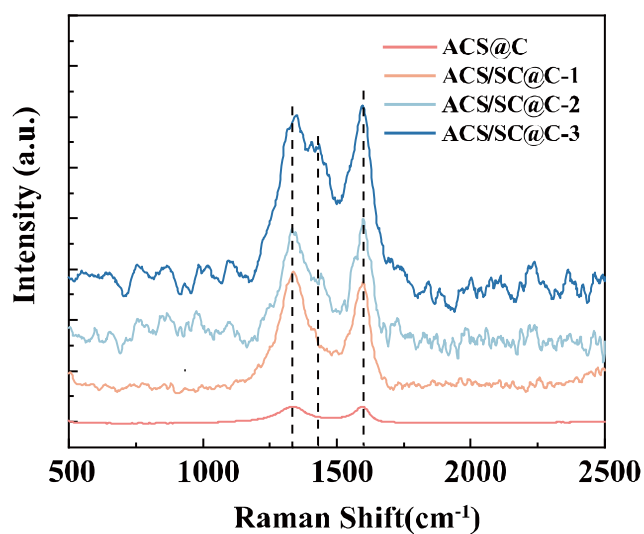

**Figure S8** Raman spectroscopy of AC and ACS/SC@C samples.

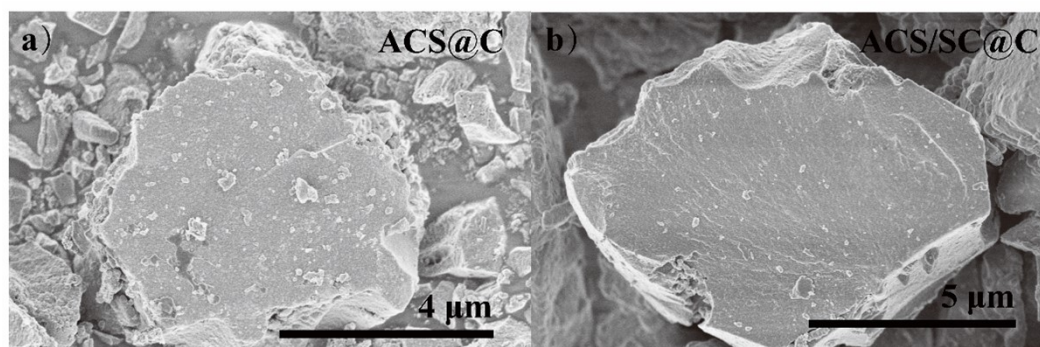

**Figure S9** SEM images of a) ACS@C and b) ACS/SC@C.

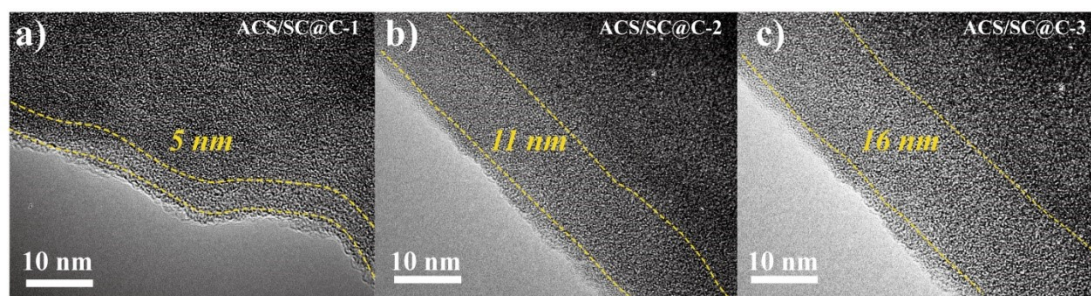

**Figure S10** HRTEM images of ACS/SC@C-1, ACS/SC@C-2, and ACS/SC@C-3.

**Table S3** Semi-quantitative elemental composition of ACS/SC@C-3 determined by EDS.

| Region             | C (wt%) | O (wt%) | Si (wt%) |
|--------------------|---------|---------|----------|
| Bulk interior      | 51.89   | 5.88    | 42.23    |
| Co-deposited layer | 64.40   | 6.89    | 28.71    |

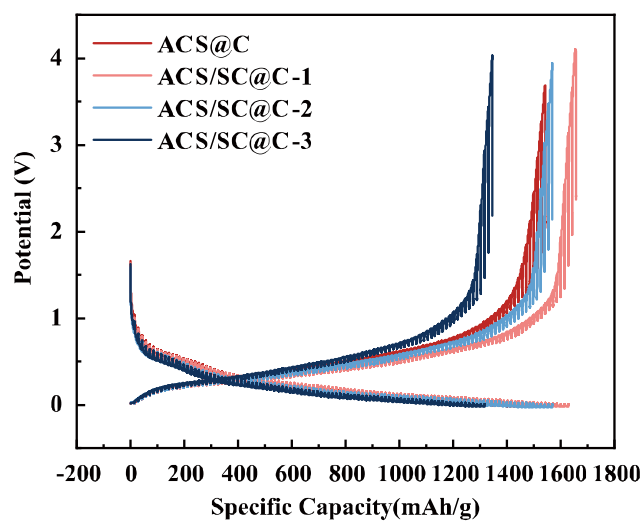

**Figure S11** GITT profiles of ACS@C and ACS/SC@C.

**Table S4** FTIR peak assignments and corresponding interfacial species during lithiation.

| Wavenumber<br>(cm <sup>-1</sup> ) | Vibrational Mode                                                                                         | Possible Chemical Species / Origin                                                                 |
|-----------------------------------|----------------------------------------------------------------------------------------------------------|----------------------------------------------------------------------------------------------------|
| 1060                              | $\nu(\text{P}=\text{O})$ stretching                                                                      | $\text{POF}_3$ and related phosphate species generated from $\text{LiPF}_6$ decomposition          |
| 1099                              | $\nu(\text{C}-\text{O}) / \nu(\text{C}-\text{O}-\text{H})$ stretching                                    | Partially reduced carbonate solvents                                                               |
| 1226                              | $\nu[(\text{C}=\text{O})-\text{O}-\text{C}]$ asymmetric stretching (ring-breathing of cyclic carbonates) | Ethylene carbonate (EC) and its early-stage reduction intermediates                                |
| 1350                              | $\nu_s(\text{COO}^-)$ symmetric stretching                                                               | Alkyl lithium carbonates ( $\text{ROCO}_2\text{Li}$ ) formed in the organic SEI phase              |
| 1500                              | $\nu_{as}(\text{COO}^-)$ asymmetric stretching                                                           | Lithium carbonate ( $\text{Li}_2\text{CO}_3$ ) and related inorganic carbonate SEI components      |
| 1755                              | $\nu(\text{C}=\text{O})$ stretching of carbonyl groups                                                   | Carboxylate-containing intermediates and polymeric organic SEI species                             |
| 1778, 1809                        | High-frequency $\nu(\text{C}=\text{O})$ stretching                                                       | Carbonate-based electrolyte solvents (EC, DEC, DMC) and their reactive decomposition intermediates |

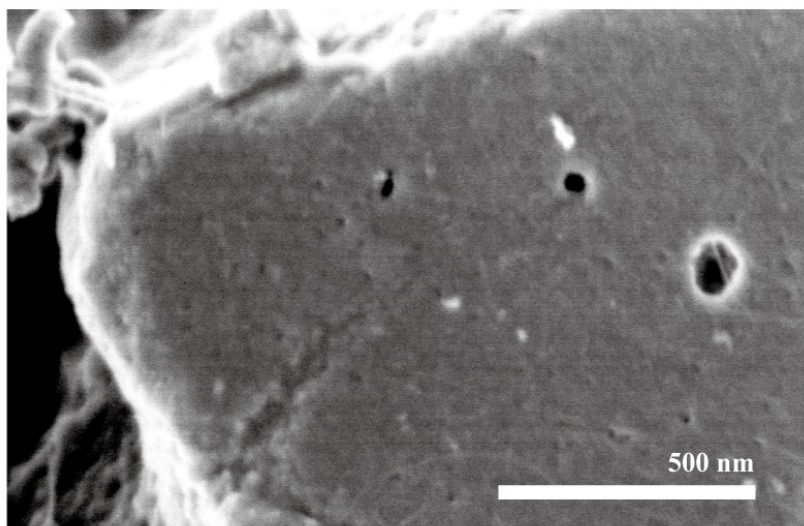

**Figure S12** Post-cycling SEM image of the ACS/SC@C electrode after 100 cycles, with the SEI layer removed prior to characterization.

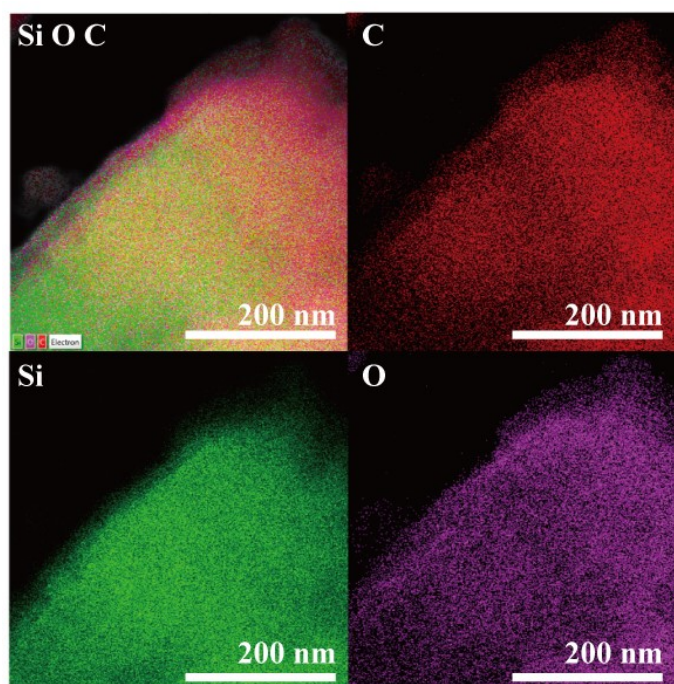

**Figure S13** Post-cycling elemental mapping analysis of the ACS/SC@C electrode after 200 cycles.

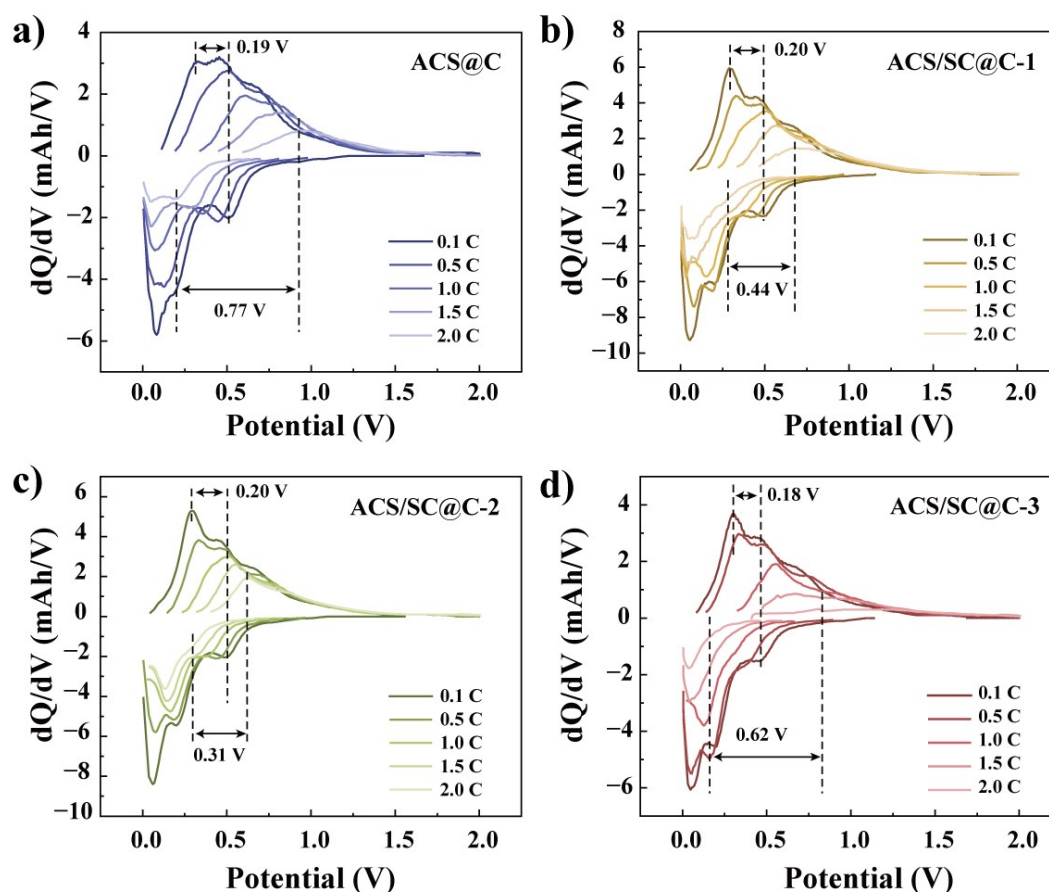

**Figure S14** dQ/dV profiles of ACS@C and ACS/SC@C electrodes at different C-rates.

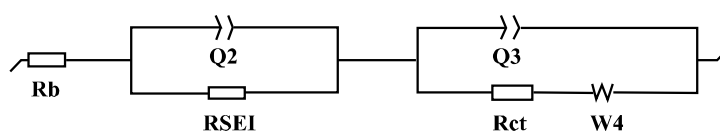

**Figure S15** Illustration of the equivalent circuit model.

**Table S5** The fitted EIS parameters of ACS@C and ACS/SC@C-2 samples after different cycles.

| Sample     | Cycle Number | $R_b$ ( $\Omega$ ) | $R_{SEI}$ ( $\Omega$ ) | $R_{ct}$ ( $\Omega$ ) |
|------------|--------------|--------------------|------------------------|-----------------------|
| ACS@C      | 50           | 3.869              | 36.32                  | 58.8                  |
|            | 150          | 7.962              | 42.12                  | 219                   |
| ACS/SC@C-2 | 50           | 4.909              | 26.74                  | 37.12                 |
|            | 150          | 3.355              | 35.35                  | 40.73                 |
